# Supplementary material for: A step closer towards achieving universal health coverage: the role of gender in enrolment in health insurance in India
Source: Springer Nature journal article supplement (doi:10.1186/s12913-023-10473-z), 2024-01-26
Supplement: MOESM1 [file 26666588]

**Table S4: Sensitivity analysis for individual enrolment (outcome 1)**

|                                | Pooled |              |  |       |
|--------------------------------|--------|--------------|--|-------|
|                                | AOR    | 95% CI       |  | p     |
| sex ind                        |        |              |  |       |
| ...male                        | 1      |              |  |       |
| ...female                      | 1.177  | 0.921 1.505  |  | 0.193 |
| sex age                        |        |              |  |       |
| ...0-14                        | 1      |              |  |       |
| ...15-49                       | 1.142  | 1.003 1.301  |  | 0.046 |
| ...50+                         | 1.173  | 0.994 1.383  |  | 0.058 |
| sex # age categories           |        |              |  |       |
| ... female # 15-49             | 1.026  | 0.889 1.183  |  | 0.730 |
| ... female # 50+               | 1.069  | 0.898 1.272  |  | 0.453 |
| relationship to hoh            |        |              |  |       |
| ... hoh                        | 1      |              |  |       |
| ... spouse                     | 0.897  | 0.589 1.366  |  | 0.614 |
| ... child                      | 0.887  | 0.807 0.975  |  | 0.013 |
| ... others                     | 0.611  | 0.530 0.705  |  | 0.000 |
| sex # relationship             |        |              |  |       |
| ... female # spouse            | 1.005  | 0.614 1.644  |  | 0.985 |
| ... female # child             | 0.787  | 0.625 0.992  |  | 0.042 |
| ... female # others            | 0.832  | 0.660 1.048  |  | 0.119 |
| caste                          |        |              |  |       |
| ...No/other/general caste      | 1      |              |  |       |
| ...scheduled caste/tribe       | 1.307  | 1.117 1.529  |  | 0.001 |
| ...other backward class        | 1.185  | 1.013 1.386  |  | 0.034 |
| religion                       |        |              |  |       |
| ...hindu                       | 1      |              |  |       |
| ...muslim                      | 0.884  | 0.759 1.029  |  | 0.112 |
| ...christian/other             | 0.618  | 0.466 0.820  |  | 0.001 |
| education ind                  |        |              |  |       |
| ...no education                | 1      |              |  |       |
| ...up to 7 years               | 1.012  | 0.935 1.097  |  | 0.762 |
| ...8 years and above           | 0.912  | 0.827 1.006  |  | 0.067 |
| occupation ind                 |        |              |  |       |
| ...farming                     | 1      |              |  |       |
| ...labourer/ daily wages       | 0.904  | 0.805 1.014  |  | 0.086 |
| ...other occup                 | 0.762  | 0.660 0.880  |  | 0.000 |
| ...student                     | 1.060  | 0.923 1.217  |  | 0.408 |
| ...housewife                   | 0.861  | 0.759 0.977  |  | 0.021 |
| ...not employed                | 0.912  | 0.793 1.049  |  | 0.198 |
| ...not yet in school           | 0.423  | 0.352 0.510  |  | 0.000 |
| below poverty line             |        |              |  |       |
| ...yes                         | 1      |              |  |       |
| ...no                          | 0.727  | 0.648 0.815  |  | 0.000 |
| household size                 | 0.872  | 0.848 0.896  |  | 0.000 |
| wealth index                   |        |              |  |       |
| ...lowest                      | 1      |              |  |       |
| ...second                      | 1.128  | 0.959 1.326  |  | 0.146 |
| ...middle                      | 1.291  | 1.097 1.518  |  | 0.002 |
| ...fourth                      | 1.184  | 1.005 1.395  |  | 0.044 |
| ...highest                     | 1.147  | 0.973 1.352  |  | 0.103 |
| state (only for pooled sample) |        |              |  |       |
| ...Bihar                       | 1      |              |  |       |
| ...Uttarakhand                 | -      |              |  |       |
| ...Uttar Pradesh               | 0.346  | 0.283 0.422  |  | 0.000 |
| ...West Bengal                 | 0.761  | 0.619 0.935  |  | 0.009 |
| ...Gujarat                     | 0.899  | 0.758 1.066  |  | 0.219 |
| ...Kerala                      | 5.459  | 4.490 6.636  |  | 0.000 |
| ...Mizoram                     | 7.862  | 5.532 11.175 |  | 0.000 |
| ...Tripura                     | 3.662  | 3.055 4.389  |  | 0.000 |

Note: Sex was the key variable of interest. The remaining covariates were not discussed in the paper.

Baselines for the interaction *sex* and *age categories* are : male#0-14, male#15-49, male#50+, female#0-14.

Baselines for the interaction *sex* and *relationship to the head of household* : male#hoh, male#spouse, male#child, male#others, female#hoh.

Abbreviations: ind = individual, hoh = head of household, AOR = adjusted odds ratio, CI = confidence interval, p = p-value.

**Table S5: Sensitivity analysis for household enrolment (outcome 2)**

|                                | Pooled |        |        | p     |
|--------------------------------|--------|--------|--------|-------|
|                                | AOR    | 95% CI |        |       |
| sex hoh                        |        |        |        |       |
| ...male                        | 1      |        |        |       |
| ...female                      | 1.283  | 1.105  | 1.491  | 0.001 |
| age hoh                        |        |        |        |       |
| ...0-14                        | -      |        |        |       |
| ...15-49                       | 1      |        |        |       |
| ...50+                         | 0.860  | 0.744  | 0.995  | 0.043 |
| caste                          |        |        |        |       |
| ...No/ other/ general caste    | 1      |        |        |       |
| ...scheduled caste/ tribe      | 1.524  | 1.109  | 2.094  | 0.009 |
| ...other backward class        | 1.354  | 0.986  | 1.858  | 0.061 |
| religion                       |        |        |        |       |
| ...hindu                       | 1      |        |        |       |
| ...muslim                      | 0.969  | 0.573  | 1.639  | 0.907 |
| ...christian/ other            | 0.743  | 0.434  | 1.273  | 0.279 |
| education hoh                  |        |        |        |       |
| ...no education                | 1      |        |        |       |
| ...up to 7 years               | 0.987  | 0.891  | 1.094  | 0.809 |
| ...8 years and above           | 0.963  | 0.828  | 1.119  | 0.620 |
| occupation hoh                 |        |        |        |       |
| ...farming                     | 1      |        |        |       |
| ...labourer/ daily wages       | 0.946  | 0.746  | 1.199  | 0.645 |
| ...other occup                 | 0.853  | 0.692  | 1.052  | 0.138 |
| ...student                     | 0.894  | 0.120  | 6.665  | 0.913 |
| ...housewife                   | 0.990  | 0.689  | 1.422  | 0.955 |
| ...not employed                | 1.009  | 0.793  | 1.283  | 0.943 |
| ...not yet in schoool          | -      |        |        |       |
| below poverty line             |        |        |        |       |
| ...yes                         | 1      |        |        |       |
| ...no                          | 0.619  | 0.285  | 1.346  | 0.226 |
| household size                 | 1.031  | 0.993  | 1.070  | 0.110 |
| wealth index                   |        |        |        |       |
| ...lowest                      | 1      |        |        |       |
| ...second                      | 1.172  | 0.888  | 1.546  | 0.262 |
| ...middle                      | 1.363  | 1.089  | 1.705  | 0.007 |
| ...fourth                      | 1.287  | 1.019  | 1.626  | 0.034 |
| ...highest                     | 1.247  | 1.028  | 1.513  | 0.025 |
| state (only for pooled sample) |        |        |        |       |
| ...Bihar                       | 1      |        |        |       |
| ...Uttarakhand                 | -      |        |        |       |
| ...Uttar Pradesh               | 0.300  | 0.121  | 0.742  | 0.009 |
| ...West Bengal                 | 0.828  | 0.396  | 1.731  | 0.615 |
| ...Gujarat                     | 0.821  | 0.467  | 1.445  | 0.494 |
| ...Kerala                      | 8.020  | 2.736  | 23.506 | 0.000 |
| ...Mizoram                     | 7.190  | 3.479  | 14.858 | 0.000 |
| ...Tripura                     | 6.169  | 2.733  | 13.925 | 0.000 |

Note: Sex was the key variable of interest. The remaining covariates were not discussed in the paper.  
Abbreviations: hoh = head of household, AOR = adjusted odds ratio, CI = confidence interval, p = p-value.



**Table S7: Results of the multivariate logistic regression for household enrolment (outcome 2)**

|                                | Pooled |        |        |       | Bihar |        |       |       | Uttarakhand |        |       |       | Uttar Pradesh |        |       |       | West Bengal |        |       |       | Gujarat |        |       |       | Kerala |        |       |       | Mizoram |        |       |       | Tripura |       |       |       |       |       |       |       |       |
|--------------------------------|--------|--------|--------|-------|-------|--------|-------|-------|-------------|--------|-------|-------|---------------|--------|-------|-------|-------------|--------|-------|-------|---------|--------|-------|-------|--------|--------|-------|-------|---------|--------|-------|-------|---------|-------|-------|-------|-------|-------|-------|-------|-------|
|                                | AOR    | 95% CI | p      |       | AOR   | 95% CI | p     |       | AOR         | 95% CI | p     |       | AOR           | 95% CI | p     |       | AOR         | 95% CI | p     |       | AOR     | 95% CI | p     |       | AOR    | 95% CI | p     |       | AOR     | 95% CI | p     |       |         |       |       |       |       |       |       |       |       |
| sex hoh                        |        |        |        |       |       |        |       |       |             |        |       |       |               |        |       |       |             |        |       |       |         |        |       |       |        |        |       |       |         |        |       |       |         |       |       |       |       |       |       |       |       |
| ...male                        | 1      |        |        |       | 1     |        |       |       | 1           |        |       |       | 1             |        |       |       | 1           |        |       |       | 1       |        |       |       | 1      |        |       |       | 1       |        |       |       |         |       |       |       |       |       |       |       |       |
| ...female                      | 1.358  | 1.142  | 1.616  | 0.001 | 1.460 | 0.968  | 2.202 | 0.071 | 2.507       | 1.142  | 5.503 | 0.022 | 0.862         | 0.813  | 0.914 | 0.000 | 1.278       | 0.772  | 2.116 | 0.340 | 0.958   | 0.705  | 1.302 | 0.783 | 1.056  | 0.791  | 1.409 | 0.712 | 1.652   | 0.955  | 2.857 | 0.072 | 1.126   | 0.493 | 2.568 | 0.778 |       |       |       |       |       |
| age hoh                        |        |        |        |       |       |        |       |       |             |        |       |       |               |        |       |       |             |        |       |       |         |        |       |       |        |        |       |       |         |        |       |       |         |       |       |       |       |       |       |       |       |
| ...0-14                        | -      |        |        |       | -     |        |       |       | -           |        |       |       | -             |        |       |       | -           |        |       |       | -       |        |       |       | -      |        |       |       | -       |        |       |       |         |       |       |       |       |       |       |       |       |
| ...15-49                       | 1      |        |        |       | 1     |        |       |       | 1           |        |       |       | 1             |        |       |       | 1           |        |       |       | 1       |        |       |       | 1      |        |       |       | 1       |        |       |       |         |       |       |       |       |       |       |       |       |
| ...50+                         | 0.872  | 0.759  | 1.001  | 0.051 | 0.776 | 0.450  | 1.337 | 0.361 | 0.967       | 0.575  | 1.626 | 0.900 | 0.696         | 0.692  | 0.699 | 0.002 | 0.780       | 0.482  | 1.264 | 0.313 | 1.027   | 0.722  | 1.462 | 0.881 | 1.312  | 0.768  | 2.241 | 0.321 | 0.701   | 0.438  | 1.121 | 0.138 | 1.016   | 0.940 | 1.099 | 0.687 |       |       |       |       |       |
| caste                          |        |        |        |       |       |        |       |       |             |        |       |       |               |        |       |       |             |        |       |       |         |        |       |       |        |        |       |       |         |        |       |       |         |       |       |       |       |       |       |       |       |
| ...No/other/general caste      | 1      |        |        |       | 1     |        |       |       | 1           |        |       |       | 1             |        |       |       | 1           |        |       |       | 1       |        |       |       | 1      |        |       |       | 1       |        |       |       |         |       |       |       |       |       |       |       |       |
| ...scheduled caste/tribe       | 1.513  | 1.138  | 2.010  | 0.004 | 1.100 | 1.076  | 1.123 | 0.000 | 1.666       | 1.408  | 1.970 | 0.000 | 0.631         | 0.369  | 1.082 | 0.094 | 2.150       | 1.759  | 2.628 | 0.000 | 0.519   | 0.168  | 1.606 | 0.255 | 1.831  | 0.472  | 7.102 | 0.382 | 1       |        |       |       |         | 0.961 | 0.737 | 1.255 | 0.772 |       |       |       |       |
| ...other backward class        | 1.355  | 1.009  | 1.821  | 0.044 | 0.840 | 0.699  | 1.008 | 0.061 | 1.499       | 0.797  | 2.820 | 0.209 | 0.808         | 0.426  | 1.534 | 0.515 | 1.712       | 0.596  | 4.918 | 0.318 | 0.471   | 0.174  | 1.276 | 0.139 | 1.895  | 0.905  | 3.968 | 0.090 | 1       |        |       |       |         | 0.799 | 0.760 | 0.839 | 0.000 |       |       |       |       |
| religion                       |        |        |        |       |       |        |       |       |             |        |       |       |               |        |       |       |             |        |       |       |         |        |       |       |        |        |       |       |         |        |       |       |         |       |       |       |       |       |       |       |       |
| ...hindu                       | 1      |        |        |       | 1     |        |       |       | 1           |        |       |       | 1             |        |       |       | 1           |        |       |       | 1       |        |       |       | 1      |        |       |       | 1       |        |       |       |         |       |       |       |       |       |       |       |       |
| ...muslim                      | 0.926  | 0.601  | 1.428  | 0.729 | 1.133 | 0.937  | 1.370 | 0.197 | 0.785       | 0.654  | 0.942 | 0.009 | 0.964         | 0.260  | 3.574 | 0.956 | 0.681       | 0.290  | 1.602 | 0.379 | 0.521   | 0.269  | 1.012 | 0.054 | 1.552  | 1.133  | 2.127 | 0.006 | 1       |        |       |       |         | 0.385 | 0.196 | 0.757 | 0.006 |       |       |       |       |
| ...christian/other             | 0.850  | 0.517  | 1.398  | 0.522 | 1     |        |       |       | 1.744       | 1.130  | 2.691 | 0.012 | 1             |        |       |       | 1           |        |       |       | 2.455   | 0.909  | 6.632 | 0.077 | 0.742  | 0.301  | 1.830 | 0.517 | 0.803   | 0.147  | 4.390 | 0.800 | 1       |       |       |       |       | 0.767 | 0.756 | 0.778 | 0.000 |
| education hoh                  |        |        |        |       |       |        |       |       |             |        |       |       |               |        |       |       |             |        |       |       |         |        |       |       |        |        |       |       |         |        |       |       |         |       |       |       |       |       |       |       |       |
| ...no education                | 1      |        |        |       | 1     |        |       |       | 1           |        |       |       | 1             |        |       |       | 1           |        |       |       | 1       |        |       |       | 1      |        |       |       | 1       |        |       |       |         |       |       |       |       |       |       |       |       |
| ...up to 7 years               | 1.025  | 0.909  | 1.156  | 0.684 | 1.079 | 0.775  | 1.502 | 0.652 | 1.334       | 0.795  | 2.240 | 0.275 | 0.688         | 0.593  | 0.799 | 0.000 | 1.024       | 0.793  | 1.321 | 0.858 | 1.000   | 0.960  | 1.043 | 0.983 | 0.825  | 0.813  | 0.837 | 0.000 | 1.164   | 0.418  | 3.237 | 0.772 | 0.804   | 0.570 | 1.136 | 0.216 |       |       |       |       |       |
| ...8 years and above           | 0.998  | 0.854  | 1.167  | 0.983 | 1.067 | 1.025  | 1.111 | 0.002 | 1.301       | 0.735  | 2.304 | 0.367 | 1.058         | 0.891  | 1.258 | 0.519 | 1.112       | 0.709  | 1.743 | 0.645 | 1.055   | 0.793  | 1.403 | 0.713 | 0.439  | 0.428  | 0.451 | 0.964 | 0.237   | 3.919  | 0.959 | 0.885 | 0.848   | 0.924 | 0.000 |       |       |       |       |       |       |
| occupation hoh                 |        |        |        |       |       |        |       |       |             |        |       |       |               |        |       |       |             |        |       |       |         |        |       |       |        |        |       |       |         |        |       |       |         |       |       |       |       |       |       |       |       |
| ...farming                     | 1      |        |        |       | 1     |        |       |       | 1           |        |       |       | 1             |        |       |       | 1           |        |       |       | 1       |        |       |       | 1      |        |       |       | 1       |        |       |       |         |       |       |       |       |       |       |       |       |
| ...labourer/ daily wages       | 0.978  | 0.783  | 1.222  | 0.846 | 1.415 | 0.706  | 2.837 | 0.328 | 1.573       | 1.045  | 2.368 | 0.030 | 0.588         | 0.527  | 0.656 | 0.000 | 1.220       | 0.785  | 1.897 | 0.376 | 0.928   | 0.675  | 1.276 | 0.647 | 1.405  | 0.383  | 5.159 | 0.609 | 1.433   | 0.660  | 3.108 | 0.363 | 1.104   | 0.734 | 1.659 | 0.635 |       |       |       |       |       |
| ...other occupation            | 0.865  | 0.709  | 1.054  | 0.150 | 1.480 | 0.670  | 3.273 | 0.332 | 1.213       | 0.963  | 1.529 | 0.101 | 0.915         | 0.679  | 1.234 | 0.561 | 1.198       | 1.163  | 1.234 | 0.000 | 0.624   | 0.423  | 0.920 | 0.017 | 1.162  | 0.996  | 1.356 | 0.057 | 0.684   | 0.477  | 0.981 | 0.039 | 0.546   | 0.316 | 0.943 | 0.030 |       |       |       |       |       |
| ...student                     | 0.666  | 0.114  | 3.877  | 0.651 | -     |        |       |       | 1           |        |       |       | 1             |        |       |       | 1           |        |       |       | 1       |        |       |       | 1      |        |       |       |         |        |       |       |         |       |       |       |       |       |       |       |       |
| ...housewife                   | 0.932  | 0.670  | 1.296  | 0.675 | 1.148 | 0.322  | 4.096 | 0.831 | 0.701       | 0.295  | 1.668 | 0.422 | 1.381         | 0.435  | 4.380 | 0.583 | 2.008       | 0.509  | 7.921 | 0.319 | 2.438   | 0.858  | 6.930 | 0.095 | 1.683  | 0.565  | 5.014 | 0.350 | 0.655   | 0.266  | 1.616 | 0.359 | 0.534   | 0.056 | 5.109 | 0.586 |       |       |       |       |       |
| ...not employed                | 1.054  | 0.841  | 1.322  | 0.648 | 1.947 | 0.815  | 4.650 | 0.134 | 1.978       | 0.788  | 4.964 | 0.146 | 0.628         | 0.371  | 1.064 | 0.084 | 0.783       | 0.326  | 1.884 | 0.585 | 1.103   | 0.483  | 2.521 | 0.816 | 1.601  | 0.778  | 3.293 | 0.201 | 0.918   | 0.684  | 1.232 | 0.569 | 0.827   | 0.519 | 1.315 | 0.422 |       |       |       |       |       |
| ...not yet in school           | -      |        |        |       | -     |        |       |       | -           |        |       |       | -             |        |       |       | -           |        |       |       | -       |        |       |       | -      |        |       |       | -       |        |       |       |         |       |       |       |       |       |       |       |       |
| below poverty line             |        |        |        |       |       |        |       |       |             |        |       |       |               |        |       |       |             |        |       |       |         |        |       |       |        |        |       |       |         |        |       |       |         |       |       |       |       |       |       |       |       |
| ...yes                         | 1      |        |        |       | 1     |        |       |       | 1           |        |       |       | 1             |        |       |       | 1           |        |       |       | 1       |        |       |       | 1      |        |       |       | 1       |        |       |       |         |       |       |       |       |       |       |       |       |
| ...no                          | 0.641  | 0.320  | 1.283  | 0.209 | 0.738 | 0.428  | 1.272 | 0.274 | 0.878       | 0.375  | 2.055 | 0.764 | 1.558         | 1.022  | 2.376 | 0.039 | 0.052       | 0.012  | 0.223 | 0.000 | 1.844   | 0.884  | 3.846 | 0.103 | 1.657  | 1.053  | 2.609 | 0.029 | 0.529   | 0.468  | 0.599 | 0.000 | 0.537   | 0.480 | 0.600 | 0.000 |       |       |       |       |       |
| household size                 | 1.035  | 1.001  | 1.071  | 0.042 | 1.049 | 0.980  | 1.122 | 0.168 | 1.079       | 1.026  | 1.134 | 0.003 | 1.012         | 0.976  | 1.049 | 0.506 | 1.151       | 1.024  | 1.293 | 0.018 | 1.061   | 0.982  | 1.145 | 0.132 | 1.023  | 1.020  | 1.025 | 0.000 | 0.803   | 0.695  | 0.927 | 0.003 | 1.075   | 0.981 | 1.178 | 0.119 |       |       |       |       |       |
| wealth index                   |        |        |        |       |       |        |       |       |             |        |       |       |               |        |       |       |             |        |       |       |         |        |       |       |        |        |       |       |         |        |       |       |         |       |       |       |       |       |       |       |       |
| ...lowest                      | 1      |        |        |       | 1     |        |       |       | 1           |        |       |       | 1             |        |       |       | 1           |        |       |       | 1       |        |       |       | 1      |        |       |       | 1       |        |       |       |         |       |       |       |       |       |       |       |       |
| ...second                      | 1.095  | 0.837  | 1.432  | 0.508 | 1.549 | 1.019  | 2.353 | 0.041 | 0.583       | 0.485  | 0.701 | 0.000 | 0.750         | 0.563  | 0.999 | 0.049 | 1.360       | 0.346  | 5.345 | 0.660 | 1.023   | 0.817  | 1.282 | 0.841 | 1.385  | 0.619  | 3.096 | 0.428 | 2.488   | 0.776  | 7.978 | 0.125 | 0.886   | 0.849 | 0.925 | 0.000 |       |       |       |       |       |
| ...middle                      | 1.229  | 0.966  | 1.564  | 0.093 | 1.381 | 1.061  | 1.798 | 0.016 | 0.497       | 0.339  | 0.727 | 0.000 | 0.782         | 0.686  | 0.891 | 0.000 | 1.349       | 0.362  | 5.029 | 0.655 | 1.767   | 1.330  | 2.348 | 0.000 | 2.070  | 1.773  | 2.418 | 0.000 | 2.311   | 1.716  | 3.113 | 0.000 | 1.122   | 0.458 | 2.748 | 0.801 |       |       |       |       |       |
| ...fourth                      | 1.177  | 0.917  | 1.509  | 0.200 | 1.297 | 1.064  | 1.582 | 0.010 | 0.578       | 0.541  | 0.618 | 0.000 | 1.092         | 1.088  | 1.096 |       | 0.793       | 0.206  | 3.050 | 0.736 | 1.946   | 1.389  | 2.725 | 0.000 | 1.469  | 0.800  | 2.697 | 0.214 | 2.023   | 1.798  | 2.277 | 0.000 | 1.168   | 0.706 | 1.935 | 0.545 |       |       |       |       |       |
| ...highest                     | 1.197  | 0.987  | 1.451  | 0.067 | 1.544 | 1.090  | 2.187 | 0.014 | 0.815       | 0.654  | 1.015 | 0.067 | 1.139         | 0.724  | 1.794 | 0.573 | 0.815       | 0.319  | 2.082 | 0.669 | 1.683   | 1.621  | 1.747 | 0.000 | 1.228  | 0.686  | 2.199 | 0.489 | 1.556   | 0.743  | 3.257 | 0.241 | 1.188   | 1.077 | 1.310 | 0.001 |       |       |       |       |       |
| state (only for pooled sample) |        |        |        |       |       |        |       |       |             |        |       |       |               |        |       |       |             |        |       |       |         |        |       |       |        |        |       |       |         |        |       |       |         |       |       |       |       |       |       |       |       |
| ...Bihar                       | 1      |        |        |       |       |        |       |       |             |        |       |       |               |        |       |       |             |        |       |       |         |        |       |       |        |        |       |       |         |        |       |       |         |       |       |       |       |       |       |       |       |
| ...Uttarakhand                 | 0.255  | 0.160  | 0.408  | 0.000 |       |        |       |       |             |        |       |       |               |        |       |       |             |        |       |       |         |        |       |       |        |        |       |       |         |        |       |       |         |       |       |       |       |       |       |       |       |
| ...Uttar Pradesh               | 0.300  | 0.123  | 0.735  | 0.008 |       |        |       |       |             |        |       |       |               |        |       |       |             |        |       |       |         |        |       |       |        |        |       |       |         |        |       |       |         |       |       |       |       |       |       |       |       |
| ...West Bengal                 | 0.839  | 0.421  | 1.671  | 0.617 |       |        |       |       |             |        |       |       |               |        |       |       |             |        |       |       |         |        |       |       |        |        |       |       |         |        |       |       |         |       |       |       |       |       |       |       |       |
| ...Gujarat                     | 0.813  | 0.471  | 1.403  | 0.456 |       |        |       |       |             |        |       |       |               |        |       |       |             |        |       |       |         |        |       |       |        |        |       |       |         |        |       |       |         |       |       |       |       |       |       |       |       |
| ...Kerala                      | 7.641  | 2.692  | 21.690 | 0.000 |       |        |       |       |             |        |       |       |               |        |       |       |             |        |       |       |         |        |       |       |        |        |       |       |         |        |       |       |         |       |       |       |       |       |       |       |       |
| ...Mizoram                     | 6.079  | 3.124  | 11.829 | 0.000 |       |        |       |       |             |        |       |       |               |        |       |       |             |        |       |       |         |        |       |       |        |        |       |       |         |        |       |       |         |       |       |       |       |       |       |       |       |
| ...Tripura                     | 6.023  | 2.709  | 13.390 | 0.000 |       |        |       |       |             |        |       |       |               |        |       |       |             |        |       |       |         |        |       |       |        |        |       |       |         |        |       |       |         |       |       |       |       |       |       |       |       |
